# Supplementary material
Source: Springer Nature journal article supplement (https://www.springermedizin.de/resource/supplementary/12885_2008_1436_MOESM1_ESM.pdf/9472000)
Supplement: MOESM1 [file 9472000]

E1 E2 E3 E4 E5

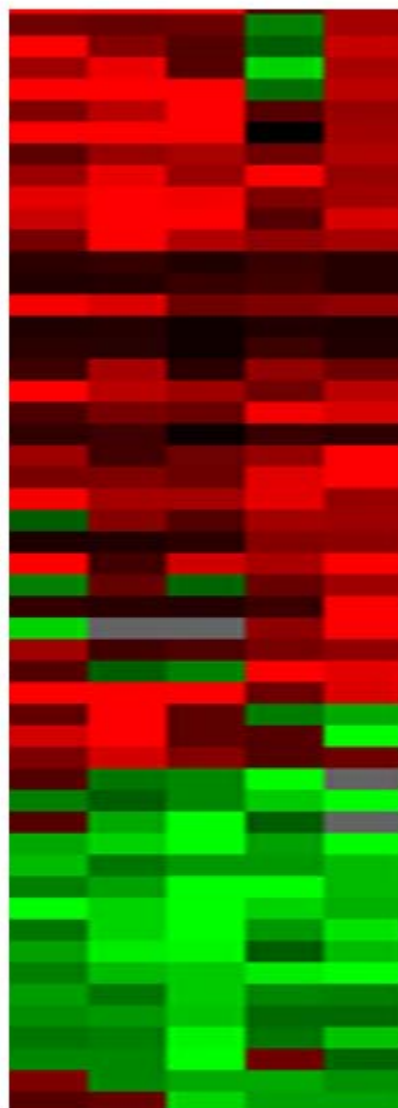

BCL2/adenovirus E1B 19KD-interacting protein 3-like  
BCL2-related protein A1  
BH3 interacting domain death agonist  
Bone morphogenetic protein 6  
Bone morphogenetic protein 7  
Bone morphogenetic protein receptor, type IA  
Bone marrow stromal protein 2 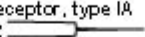  
BRCA1 associate protein  
BRCA1 Ring domain  
Caspase 3  
Caspase 8  
Cytochrome c oxidase subunit Va  
Cytochrome c oxidase subunit Vb  
Cytochrome c oxidase subunit Vc  
Cytochrome c oxidase subunit VIlb  
Cytochrome P450, subfamily XXIV  
Deleted in liver cancer 1  
Deleted in oral cancer 1  
E-2F transcription factor  
EphA2  
Fas-associated viadeth domain  
FAT tumor suppressor homolog  
G-protein pathway suppressor 2  
G protein, alpha inhibiting activity polypeptide 2  
Integrin, alpha 2  
Integrin, beta 4  
Integrin-linked kinase  
Interferon gamma up-regulated protein precursor  
Jagged 1  
kinesin family member C3  
kinesin-like4  
kinesin-like5  
kinesin-like6  
SMAD6  
SMAD4  
Matrix metalloproteinase  
Mitogen-activated protein kinase 10  
Mitogen-activated protein kinase kinase 11  
Murine leukemia virus oncogene homolog  
Polymerase (RNA) II polypeptide C  
Polymerase (RNA) II polypeptide E  
Polymerase (RNA) II polypeptide G  
Polymerase (RNA) II polypeptide J  
RAD51  
RAR  
Ras responsive element binding protein 1  
tumor suppressing subtransferable candidate 1  
Vascular endothelial growth factor C  
v-Myc avian myelocytomatosis viral related oncogene

BST2
